# Supplementary material
Source: PubMed Central journal article supplement (PMC3511993)
Supplement: mmc1.pdf [file mmc1.pdf]

## Supplemental Data

### Prioritizing Genetic Variants for Causality

#### on the Basis of Preferential Linkage Disequilibrium

Qianqian Zhu, Dongliang Ge, Erin L. Heinzen, Samuel P. Dickson, Thomas J. Urban, Mingfu Zhu, Jessica M. Maia, Min He, Qian Zhao, Kevin V. Shianna, and David B. Goldstein

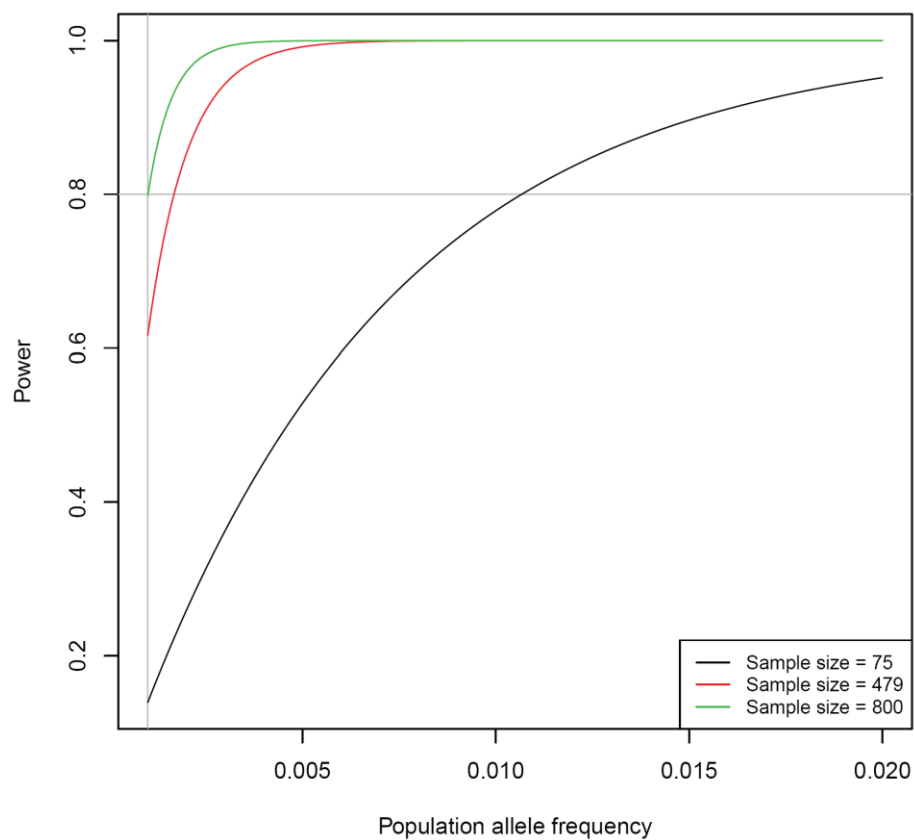

**Figure S1. The Power of Detecting the Alleles of Variants in Our Samples**

The grey vertical line corresponds to allele frequency 0.1%.

**Table S1. The Ranking of the Causal Variants When Changing the MAF Requirements of the Candidate SNVs at Step 1\***

| Phenotype                            | Discovery SNP | Causal SNV | Rank of the Causal SNV among Final Candidates                   |                                                                 |                                  |
|--------------------------------------|---------------|------------|-----------------------------------------------------------------|-----------------------------------------------------------------|----------------------------------|
|                                      |               |            | MAF of Candidate SNVs $\leq$ min(15%, MAF of the Discovery SNP) | MAF of Candidate SNVs $\leq$ min(50%, MAF of the Discovery SNP) | MAF of Candidate SNVs $\leq$ 50% |
| Crohn disease                        | rs17221417    | rs2066844  | 1                                                               | 1                                                               | 1                                |
|                                      |               | rs2066845  | 2                                                               | 2                                                               | 2                                |
| Crohn disease                        | rs2076756     | rs2066845  | 1                                                               | 1                                                               | 1                                |
|                                      |               | rs2066844  | 2                                                               | 2                                                               | 2                                |
| Ribavirin induced haemolytic anaemia | rs6051702     | rs1127354  | 1                                                               | 2                                                               | 2                                |
|                                      |               | rs7270101  | 2                                                               | 3                                                               | 3                                |
| Therapeutic warfarin dose            | rs4917639     | rs1799853  | 2                                                               | 2                                                               | 2                                |
| Bladder cancer                       | rs11892031    | rs17863783 | 23                                                              | 23                                                              | 30                               |
| Hearing Loss                         | rs870729      | rs80338945 | 5                                                               | 5                                                               | 7                                |
| Hearing Loss                         | rs7329467     | rs35887622 | 6                                                               | 6                                                               | 6                                |

\*: all other parameters were set as default.

**Table S2. The Ranking of the Causal Variants When Changing the Weight for PhastCons Score at Step 4\***

| Phenotype                            | Discovery SNP | Causal SNV | Rank of the Causal SNV among Final Candidates |           |           |           |           |           |
|--------------------------------------|---------------|------------|-----------------------------------------------|-----------|-----------|-----------|-----------|-----------|
|                                      |               |            | $w = 0$                                       | $w = 0.1$ | $w = 0.2$ | $w = 0.3$ | $w = 0.4$ | $w = 0.5$ |
| Crohn disease                        | rs17221417    | rs2066844  | 34                                            | 1         | 1         | 1         | 1         | 2         |
|                                      |               | rs2066845  | 38                                            | 3         | 2         | 2         | 2         | 1         |
| Crohn disease                        | rs2076756     | rs2066845  | 27                                            | 2         | 2         | 1         | 1         | 1         |
|                                      |               | rs2066844  | 19                                            | 1         | 1         | 2         | 2         | 2         |
| Ribavirin induced haemolytic anaemia | rs6051702     | rs1127354  | 26                                            | 1         | 1         | 1         | 1         | 1         |
|                                      |               | rs7270101  | 19                                            | 2         | 2         | 2         | 3         | 3         |
| Therapeutic warfarin dose            | rs4917639     | rs1799853  | 5                                             | 1         | 2         | 2         | 2         | 2         |
| Bladder cancer                       | rs11892031    | rs17863783 | 20                                            | 20        | 21        | 23        | 24        | 27        |
| Hearing Loss                         | rs870729      | rs80338945 | 150                                           | 99        | 84        | 5         | 4         | 2         |
| Hearing Loss                         | rs7329467     | rs35887622 | 12                                            | 2         | 5         | 6         | 7         | 7         |

\*: all other parameters were set as default.

**Table S3. The Ranking of the Causal Variants When Using PhyloP Score at Step 4\***

| Phenotype                            | Discovery SNP | Causal SNV | Rank of the Causal SNV among Final Candidates |         |         |         |         |         |
|--------------------------------------|---------------|------------|-----------------------------------------------|---------|---------|---------|---------|---------|
|                                      |               |            | w = 0                                         | w = 0.1 | w = 0.2 | w = 0.3 | w = 0.4 | w = 0.5 |
| Crohn disease                        | rs17221417    | rs2066844  | 34                                            | 10      | 9       | 8       | 6       | 6       |
|                                      |               | rs2066845  | 38                                            | 12      | 11      | 10      | 8       | 5       |
| Crohn disease                        | rs2076756     | rs2066845  | 27                                            | 8       | 5       | 1       | 1       | 1       |
|                                      |               | rs2066844  | 19                                            | 2       | 2       | 3       | 3       | 3       |
| Ribavirin induced haemolytic anaemia | rs6051702     | rs1127354  | 26                                            | 7       | 5       | 5       | 4       | 3       |
|                                      |               | rs7270101  | 19                                            | 5       | 4       | 4       | 3       | 4       |
| Therapeutic warfarin dose            | rs4917639     | rs1799853  | 5                                             | 4       | 5       | 5       | 5       | 6       |
| Bladder cancer                       | rs11892031    | rs17863783 | 20                                            | 1       | 1       | 1       | 1       | 1       |
| Hearing Loss                         | rs870729      | rs80338945 | 150                                           | 128     | 113     | 53      | 46      | 43      |
| Hearing Loss                         | rs7329467     | rs35887622 | 12                                            | 1       | 1       | 1       | 1       | 1       |

\*: the ranking score for the  $i$  th candidate SNV

$$S_i = w \times \frac{1 + \text{sgn}(\text{PhyloP}_i) \times (1 - 10^{-|\text{PhyloP}_i|})}{2} + (1 - w) \times \left(1 - \frac{P_{LD,i}}{0.05}\right),$$

$\text{PhyloP}_i$  is the PhyloP score for primates at the corresponding genomic position,  $w$  is the weight for the PhyloP score, and  $P_{LD,i}$  is the corresponding Preferential LD value. All other parameters were set as default.

**Table S4. Performance of the Preferential LD Approach on GWAS with Known Causal Variants Using Genotypes from the 1000 Genomes Project**

| Phenotype                            | Discovery SNP | # of Candidate SNVs |        |        |        | Rank of the Causal SNV in Step 4 |
|--------------------------------------|---------------|---------------------|--------|--------|--------|----------------------------------|
|                                      |               | Step 1              | Step 2 | Step 3 | Step 4 |                                  |
| Crohn disease                        | rs17221417    | 539                 | 536    | 536    | 121    | 1 (rs2066844)                    |
|                                      |               |                     |        |        |        | 2 (rs2066845)                    |
| Crohn disease                        | rs2076756     | 367                 | 366    | 366    | 127    | 2 (rs2066845)                    |
|                                      |               |                     |        |        |        | 3 (rs2066844)                    |
| Ribavirin induced haemolytic anaemia | rs6051702     | 809                 | 800    | 579    | 88     | 1 (rs1127354)                    |
|                                      |               |                     |        |        |        | 2 (rs7270101)                    |
| Therapeutic warfarin dose            | rs4917639     | 1678                | 1674   | 1440   | 178    | 2 (rs1799853)                    |
| Bladder cancer                       | rs11892031    | 489                 | 489    | 434    | 191    | 40 (rs17863783)                  |
| Hearing Loss                         | rs7329467     | 440                 | 440    | 280    | 223    | 60 (rs35887622)                  |

**Table S5. The Ranking of the Common Causal Variants Using Different Statistics<sup>a</sup>**

| Phenotype               | Discovery SNP          | Causal SNV              | MAF   | Rank of Causal SNV in Step 4 <sup>b</sup> | Rank of the Causal SNV in Step 1 <sup>c</sup> |                |                 |           |               |
|-------------------------|------------------------|-------------------------|-------|-------------------------------------------|-----------------------------------------------|----------------|-----------------|-----------|---------------|
|                         |                        |                         |       |                                           | D'                                            | r <sup>2</sup> | P <sub>LD</sub> | PhastCons | Sorting Score |
| Coronary artery disease | rs1333049 <sup>1</sup> | rs10757278 <sup>2</sup> | 0.496 | 7                                         | 1927                                          | 3              | 8               | 184       | 7             |
|                         |                        | rs10811656 <sup>2</sup> | 0.420 | 8                                         | 1934                                          | 6              | 8               | 226       | 8             |
| Prostate Cancer         | rs1447295 <sup>3</sup> | rs11986220 <sup>4</sup> | 0.088 | 9                                         | 604                                           | 25             | 29              | 209       | 15            |

<sup>a</sup>: the preferential LD approach was applied without any MAF requirement of the candidate SNVs while all other parameters were unchanged.

<sup>b</sup>: the rank of causal SNV among final candidates obtained at step 4 of the preferential LD approach.

<sup>c</sup>: the rank of the causal SNV among candidate obtained at step 1 of the preferential LD approach using the corresponding statistic; the rank of the causal variant is the number of candidate SNVs with an equal or better value of the corresponding statistic than the causal variant.

#### References:

1. Samani, N.J., Erdmann, J., Hall, A.S., Hengstenberg, C., Mangino, M., Mayer, B., Dixon, R.J., Meitinger, T., Braund, P., Wichmann, H.-E., et al. (2007). Genomewide Association Analysis of Coronary Artery Disease. *New England Journal of Medicine* 357, 443-453.
2. Harismendy, O., Notani, D., Song, X., Rahim, N.G., Tanasa, B., Heintzman, N., Ren, B., Fu, X.-D., Topol, E.J., Rosenfeld, M.G., et al. (2011). 9p21 DNA variants associated with coronary artery disease impair interferon- $\gamma$  signalling response. *Nature* 470, 264-268.
3. Yeager, M., Orr, N., Hayes, R.B., Jacobs, K.B., Kraft, P., Wacholder, S., Minichiello, M.J., Fearnhead, P., Yu, K., Chatterjee, N., et al. (2007). Genome-wide association study of prostate cancer identifies a second risk locus at 8q24. *Nat Genet* 39, 645-649.
4. Jia, L., Landan, G., Pomerantz, M., Jaschek, R., Herman, P., Reich, D., Yan, C., Khalid, O., Kantoff, P., Oh, W., et al. (2009). Functional Enhancers at the Gene-Poor 8q24 Cancer-Linked Locus. *PLoS Genet* 5, e1000597.
